# Supplementary material for: Coupling chiral homogeneous biocatalytic reactions with benign heterogeneous separation
Source: Royal Society of Chemistry journal article supplement (doi:10.1039/b701409k), 2007-01-01
Supplement: b701409k.pdf [file b701409k.pdf]

A

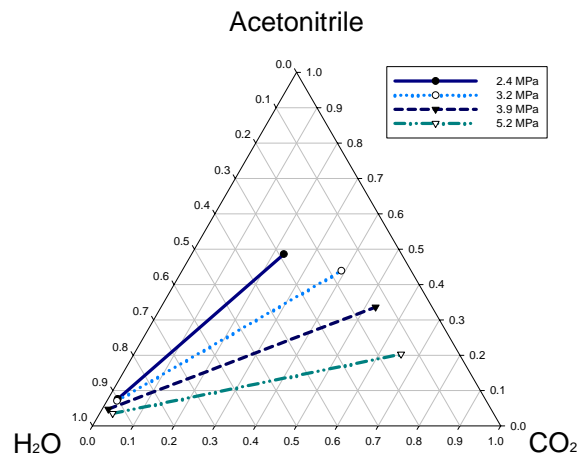

B

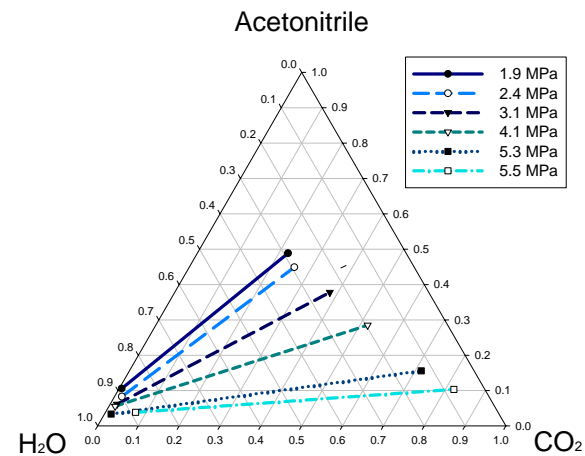

C

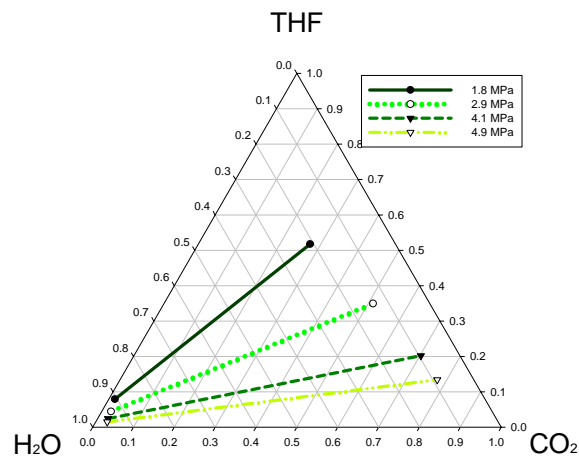

D\*

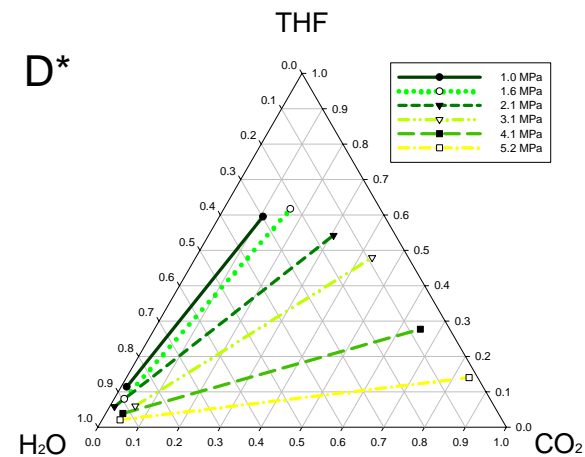

Ternary Phase Data: A) Acetonitrile OATS with 150 mM phosphate buffer. B) unbuffered Acetonitrile OATS system. C) Tetrahydrofuran (THF) with 150 mM phosphate buffer. D\*) THF OATS with 150 mM HEPES buffer.
